# Supplementary material for: Fusarium equiseti as an Emerging Foliar Pathogen of Lettuce in Greece: Identification and Development of a Real-Time PCR for Quantification of Inoculum in Soil Samples
Source: MDPI journal article supplement (doi:10.3390/pathogens11111357), 2022-11-15
Supplement: s1 [file s1]

**A**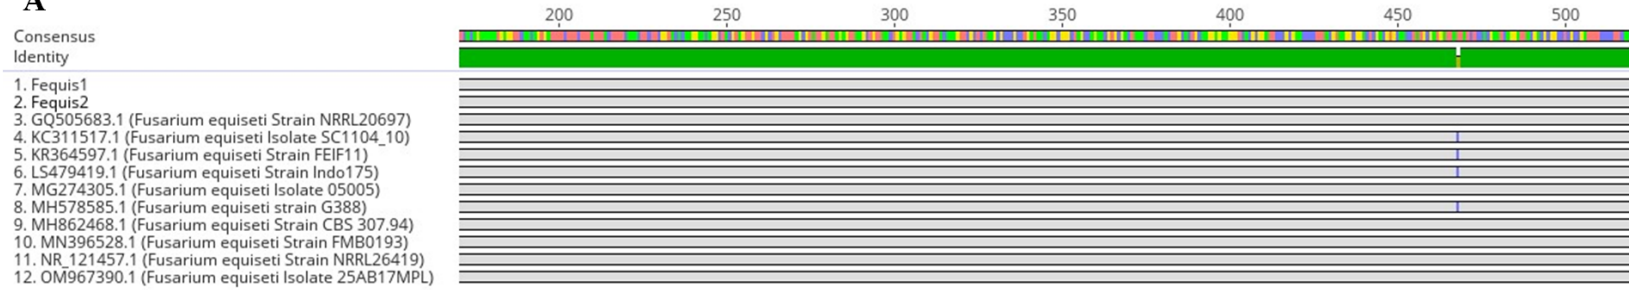**B**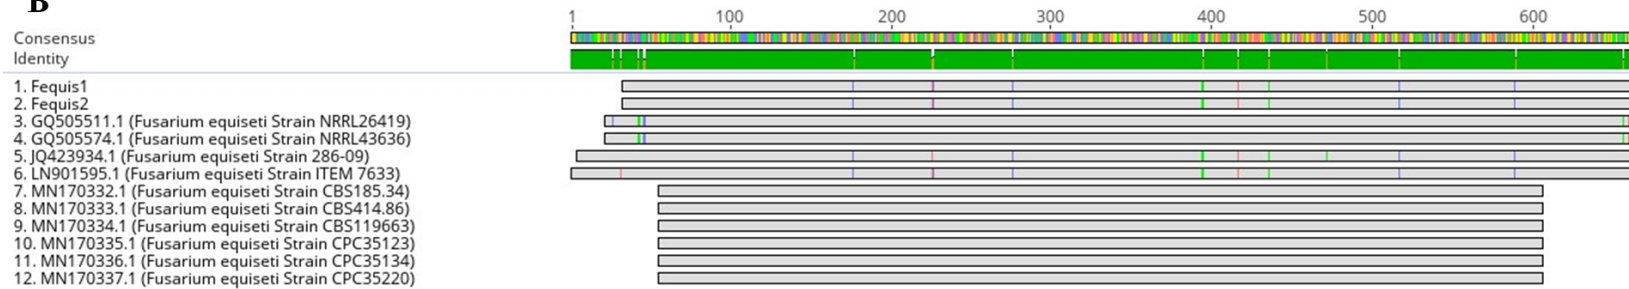

C

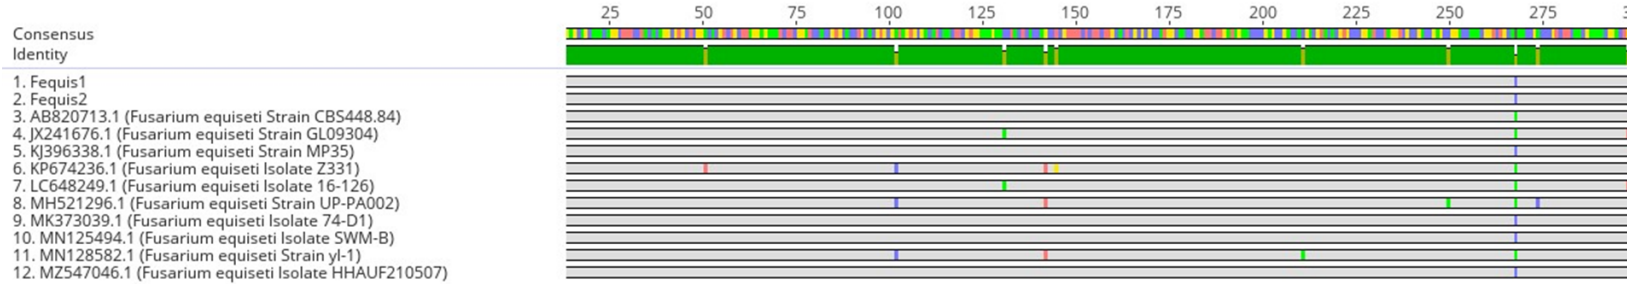

D

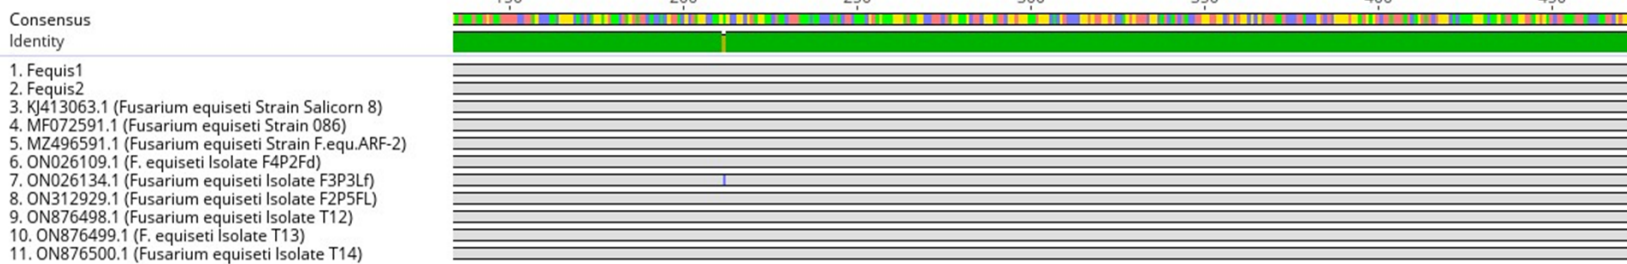

**Figure S1.** Partial sequence alignments of the A) ITS-rDNA, and B) *CAM*, C) *Bt*, and D) *SSU* genes from the *F. equiseti* isolates used in this study (Fequis1 and Fequis2) and the relevant best hit BLAST *F. equiseti* sequences from the NCBI database.
