# Supplementary material for: Fusarium equiseti as an Emerging Foliar Pathogen of Lettuce in Greece: Identification and Development of a Real-Time PCR for Quantification of Inoculum in Soil Samples
Source: MDPI journal article supplement (doi:10.3390/pathogens11111357), 2022-11-15
Supplement: s1 [file s1]

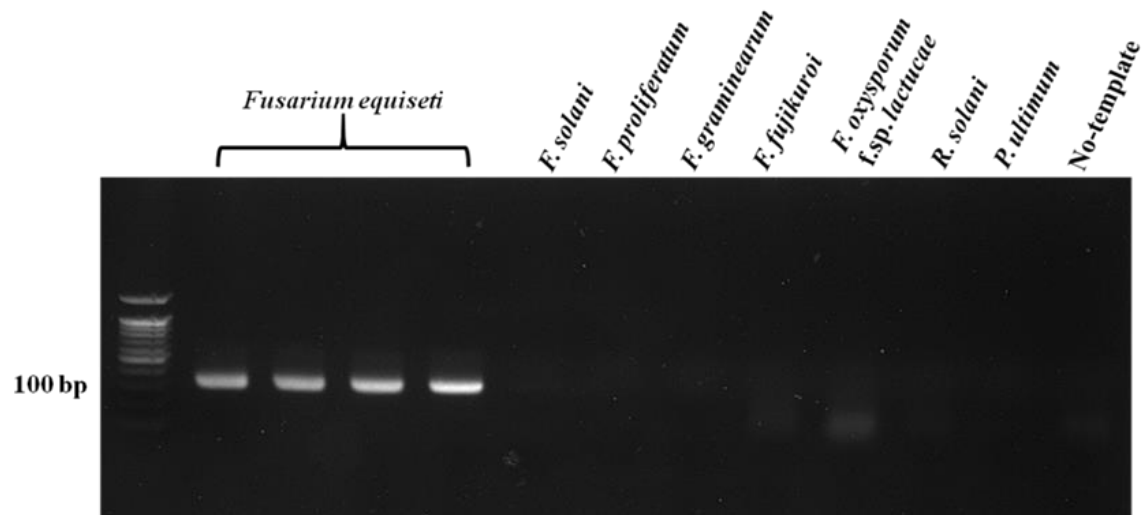

**Figure S2.** PCR amplicons of 128 bp obtained with the *F. equiseti* specific primers designed in this study. No amplified product was observed for the DNA samples extracted from other soilborne pathogens, except primer dimers in *Fusarium oxysporum* f.sp. *lactucae* lane. Size marker 100 bp.
