# Supplementary material for: Fusarium equiseti as an Emerging Foliar Pathogen of Lettuce in Greece: Identification and Development of a Real-Time PCR for Quantification of Inoculum in Soil Samples
Source: MDPI journal article supplement (doi:10.3390/pathogens11111357), 2022-11-15
Supplement: s1 [file s1]

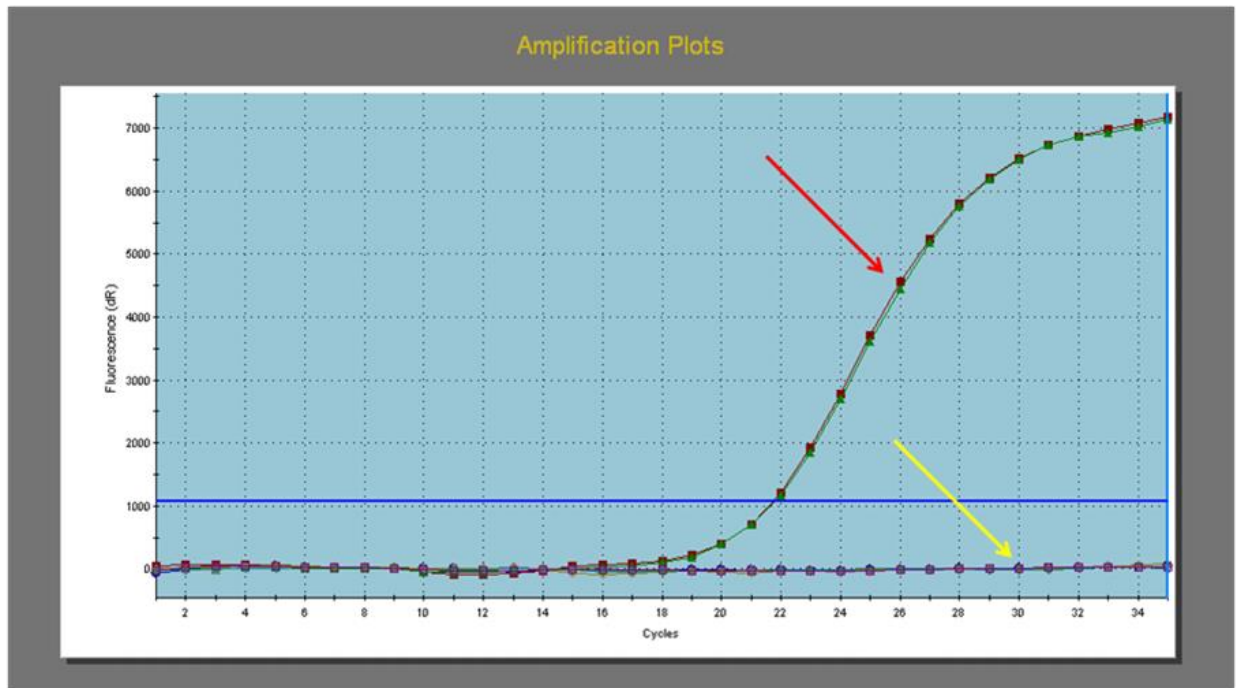

**Figure S3.** Analysis of *Fusarium equiseti* primers-probe specificity. Amplification was observed only on the targeted *Fusarium equiseti* species (red arrow). No amplification was recorded on off-target soilborne fungal species and no-template samples (yellow arrow) included in the qPCR assay.
